# Supplementary material for: Rb2SeOCl4·H2O: a polar material among the alkali metal selenite halides with a strong SHG response
Source: Royal Society of Chemistry journal article supplement (doi:10.1039/c6dt02608g), 2016-01-01
Supplement: c6dt02608g1.pdf [file c6dt02608g1.pdf]

## Electronic Supplementary Information:

### **Rb<sub>2</sub>SeOCl<sub>4</sub>·H<sub>2</sub>O: A polar material among the alkali metal selenite halides with strong SHG response**

**Qi Wu,<sup>a,b†</sup> Hongming Liu,<sup>a†</sup> Lei Kang,<sup>c</sup> Zheshuai Lin,<sup>c\*</sup> Xianggao Meng,<sup>d</sup> Xingguo Chen,<sup>a</sup> Jingui Qin<sup>a\*</sup>**

<sup>a</sup> Department of Chemistry, Wuhan University, Wuhan 430072, China.

<sup>b</sup> Department of Chemistry, Hubei Normal University, Huangshi 435002, China.

<sup>c</sup> Technical Institute of Physics and Chemistry, Chinese Academy of Sciences, Beijing 100190, China

<sup>d</sup> Department of Chemistry, Central China Normal University, Wuhan 430079, China

**Figure S1.** X-ray diffraction powder patterns for Rb<sub>2</sub>SeOCl<sub>4</sub>·H<sub>2</sub>O: Calculated and experimental.

**Figure S2.** The EDX spectrum of Rb<sub>2</sub>SeOCl<sub>4</sub>·H<sub>2</sub>O crystal

**Figure S3.** FTIR spectrum for Rb<sub>2</sub>SeOCl<sub>4</sub>·H<sub>2</sub>O.( 4000 – 400 cm<sup>-1</sup> region)

**Figure S4.** The total and partial density of states (T/PDOS) of Rb<sub>2</sub>SeOCl<sub>4</sub>·H<sub>2</sub>O

**Table S1.** Atomic coordinates and equivalent isotropic displacement parameters for Rb<sub>2</sub>SeOCl<sub>4</sub>·H<sub>2</sub>O.

**Table S2.** Bond lengths(Å) for Rb<sub>2</sub>SeOCl<sub>4</sub>·H<sub>2</sub>O.

**Table S3.** Bond angles(°) for Rb<sub>2</sub>SeOCl<sub>4</sub>·H<sub>2</sub>O.

**Table S4.** The calculated linear and nonlinear optical properties of Rb<sub>2</sub>SeOCl<sub>4</sub>·H<sub>2</sub>O

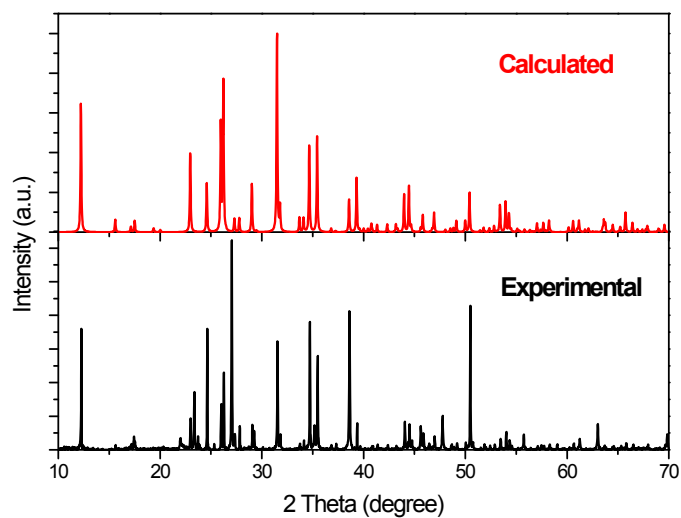

**Figure S1.** X-ray diffraction powder patterns for  $\text{Rb}_2\text{SeOCl}_4 \cdot \text{H}_2\text{O}$ : Calculated and experimental.

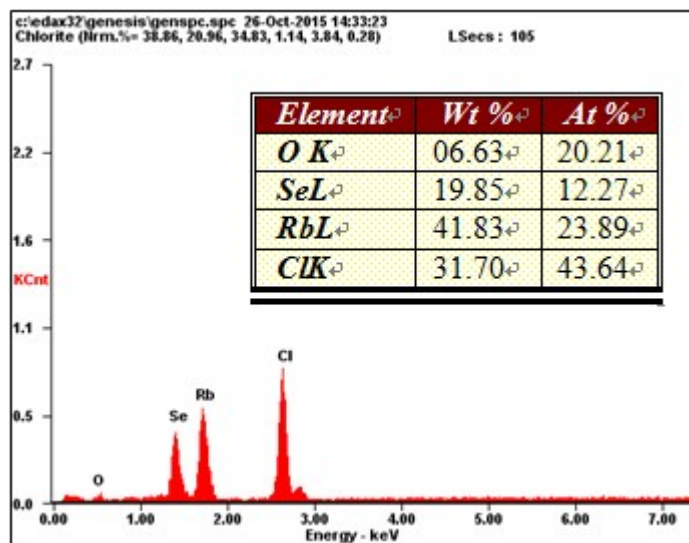

**Figure S2.** The EDX spectrum of  $\text{Rb}_2\text{SeOCl}_4 \cdot \text{H}_2\text{O}$  crystal

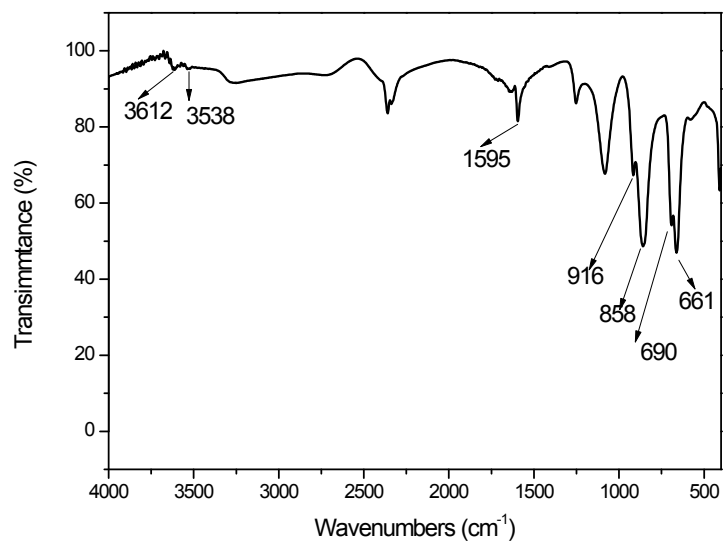

**Figure S3.** FTIR spectrum for  $\text{Rb}_2\text{SeOCl}_4 \cdot \text{H}_2\text{O}$  (4000 – 400  $\text{cm}^{-1}$  region)

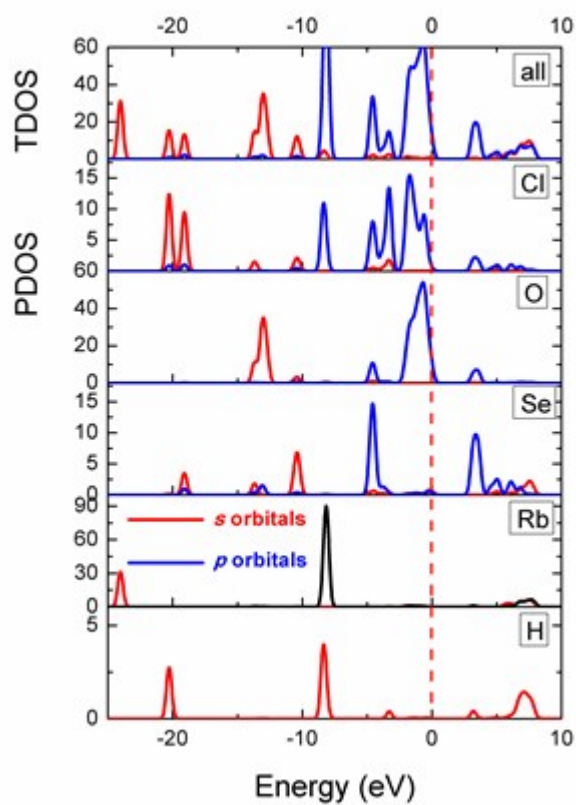

**Figure S4** The total and partial density of states (T/PDOS) of  $\text{Rb}_2\text{SeOCl}_4 \cdot \text{H}_2\text{O}$

**Table S1.** Atomic coordinates and equivalent isotropic displacement parameters for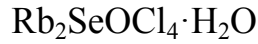

|       | x       | y       | z        | U(eq) |
|-------|---------|---------|----------|-------|
| Cl(1) | 10000   | 7662(2) | 7504(4)  | 32(1) |
| Cl(2) | 10000   | 7517(2) | 3331(4)  | 33(1) |
| Cl(3) | 7613(2) | 9967(2) | 2893(2)  | 34(1) |
| O(1)  | 5000    | 9615(7) | 5396(12) | 55(2) |
| O(2)  | 5000    | 5387(7) | 5861(7)  | 32(2) |
| Rb(1) | 7180(1) | 7582(1) | 5383(1)  | 36(1) |
| Se(1) | 5000    | 5100(1) | 7606(2)  | 21(1) |

<sup>a</sup>U(eq) is defined as one third of the trace of the othogonalized  $U^{ij}$  tensor

**Table S2.** Bond lengths(Å) for  $\text{Rb}_2\text{SeOCl}_4 \cdot \text{H}_2\text{O}$ .

| Bond           | Bond distances | Bond       | Bond distances |
|----------------|----------------|------------|----------------|
| Se(1)-Cl(1)#12 | 2.470(2)       | Se(1)-O(2) | 1.624(7)       |
| Se(1)-Cl(3)#3  | 2.483(2)       | O(1)-H(1A) | 0.8500         |
| Se(1)-Cl(3)#13 | 2.483(2)       | O(1)-H(1B) | 0.8500         |
| Se(1)-Cl(2)#3  | 2.502(3)       |            |                |

**Table S3.** Bond angles(°) for  $\text{Rb}_2\text{SeOCl}_4 \cdot \text{H}_2\text{O}$ .

| Bond                    | Angles     | Bond                   | Angles     |
|-------------------------|------------|------------------------|------------|
| O(2)-Se(1)-Cl(1)#12     | 98.2(3)    | O(2)-Se(1)-Cl(2)#3     | 95.1(3)    |
| O(2)-Se(1)-Cl(3)#3      | 96.25(6)   | Cl(1)#12-Se(1)-Cl(2)#3 | 166.79(16) |
| Cl(1)#12-Se(1)-Cl(3)#3  | 88.67(5)   | Cl(3)#3-Se(1)-Cl(2)#3  | 89.90(5)   |
| O(2)-Se(1)-Cl(3)#13     | 96.25(6)   | Cl(3)#13-Se(1)-Cl(2)#3 | 89.90(5)   |
| Cl(1)#12-Se(1)-Cl(3)#13 | 88.67(5)   | H(1A)-O(1)-H(1B)       | 110.2      |
| Cl(3)#3-Se(1)-Cl(3)#13  | 167.46(12) |                        |            |

**Table S4.** The calculated linear and nonlinear optical properties of  $\text{Rb}_2\text{SeOCl}_4 \cdot \text{H}_2\text{O}$ 

|                                                      | Cal. band gap (eV) | Cal. SHG $d_{ij}$ (pm/V)                     |
|------------------------------------------------------|--------------------|----------------------------------------------|
| $\text{Rb}_2\text{SeOCl}_4 \cdot \text{H}_2\text{O}$ | 3.14               | $d_{15} = d_{24} = 9.63$<br>$d_{33} = -4.67$ |

<sup>#</sup> $d_{36}(\text{KDP}) = 0.39$  pm/V;  $\langle d_{\text{eff}} \rangle(\text{KDP}) = 0.33$  pm/V
